# Supplementary material
Source: PubMed Central journal article supplement (PMC3512147)
Supplement: 35b696dceeedb29ed2fd5b3eed10ab49_genetics.112.145714-4.pdf [file 35b696dceeedb29ed2fd5b3eed10ab49_genetics.112.145714-4.pdf]

**Table S1 Sample locations of M strains**

| Continent        | Country      | specific position | name      | stock number | Source            |
|------------------|--------------|-------------------|-----------|--------------|-------------------|
| Africa           | South Africa | Capetown          | CA1       | 3846         | BDSC <sup>a</sup> |
|                  | Zimbabwe     | Kariba Dam        | KSA2      | 3852         | BDSC              |
|                  |              | Kariba Dam        | KSA3      | 3853         | BDSC              |
|                  |              | Kariba Dam        | KSA4      | 3854         | BDSC              |
| Northern America | USA          | South Carolina    | Wild 10E  | 3892         | BDSC              |
|                  |              | North Carolina    | Wild 11A  | 3893         | BDSC              |
|                  |              | North Carolina    | Wild 11C  | 3894         | BDSC              |
|                  |              | North Carolina    | Wild 11D  | 3895         | BDSC              |
|                  |              | New York          | EV        | 3851         | BDSC              |
|                  |              | New York          | MO1       | 3857         | BDSC              |
|                  |              | New York          | Wild 1B   | 3880         | BDSC              |
|                  |              | Wisconsin         | MWA1      | 3859         | BDSC              |
|                  |              | Wisconsin         | Lausanne  | 4268         | BDSC              |
|                  |              | Ohio              | Canton-S  | 1            | BDSC              |
|                  |              | Massachusetts     | Amherst   | 4265         | BDSC              |
|                  |              | Illinois          | Urbana-S  | 4272         | BDSC              |
|                  |              | Oregon            | Oregon-R  | 5            | BDSC              |
|                  |              | Riverside         | RC1       | 3865         | BDSC              |
|                  |              | Riverside         | RVC2      | 3869         | BDSC              |
|                  |              | South America     | Columbia  | Bogata       | BOG3              |
| Asia             | Japan        | Iriomote island   | IR98-01   |              | M Itoh            |
|                  |              | Iriomote island   | IR98-06   |              | M Itoh            |
|                  |              | Hikone            | HikoneR   |              | M Itoh            |
| Europe           | Russia       | Uzbek Republic    | Samarkand | 4270         | BDSC              |
|                  | Spain        | Pyrenees          | PYR3      | 3863         | BDSC              |
|                  | Portugal     | Madeira           | Reids1    | 3866         | BDSC              |
|                  | Greece       | Athens            | VAG2      | 3876         | BDSC              |
|                  |              | Athens            | VAG3      | 3877         | BDSC              |
|                  | Sweden       | Stockholm         | Swedish-C | 4271         | BDSC              |

<sup>a</sup> Bloomington Drosophila Stock Center
