# Supplementary material
Source: PubMed Central journal article supplement (PMC3512147)
Supplement: 71e3751c7055b3838dad1d349b5b565d_genetics.112.145714-5.pdf [file 71e3751c7055b3838dad1d349b5b565d_genetics.112.145714-5.pdf]

**Table S4 Information of Control Genes**

| symbol         | FBgn        | gene functions                                                                        |
|----------------|-------------|---------------------------------------------------------------------------------------|
| <i>jeb</i>     | FBgn0086677 | visceral mesoderm development                                                         |
| <i>CG8378</i>  | FBgn0027495 | negative regulation of transcription                                                  |
| <i>CG13178</i> | FBgn0033685 | cilium assembly                                                                       |
| <i>CG8878</i>  | FBgn0027504 | protein serine/threonine kinase; protein phosphorylation                              |
| <i>CG8407</i>  | FBgn0033687 | microtubule-based movement                                                            |
| <i>Oda</i>     | FBgn0014184 | cell differentiation; embryonic development                                           |
| <i>wash</i>    | FBgn0033692 | GTPase binding; signal transductions; actin filament and microtubule bundles assembly |
| <i>CG33964</i> | FBgn0053964 | unknown                                                                               |
| <i>Cyp6t3</i>  | FBgn0033697 | oxidation-reduction process                                                           |
| <i>RpS11</i>   | FBgn0033699 | structural constituent of ribosome; translation; mitotic spindle organization         |
| <i>Sr-CII</i>  | FBgn0020377 | scavenger receptor activity; defense response                                         |
