# Supplementary material
Source: PubMed Central journal article supplement (PMC3512147)
Supplement: 466e2e4502a85e4cae287a020bb63172_genetics.112.145714-3.pdf [file 466e2e4502a85e4cae287a020bb63172_genetics.112.145714-3.pdf]

**Table S2** Lineage-specific divergence on the *D. melanogaster* and *D. simulans* branches of TE-interacting and immunity genes

| gene name      | FBgn        | <i>mel</i> dN/dS | <i>mel</i> dN | <i>mel</i> dS | <i>sim</i> dN/dS | <i>sim</i> dN | <i>sim</i> dS | functional class |
|----------------|-------------|------------------|---------------|---------------|------------------|---------------|---------------|------------------|
| <i>Ago3</i>    | FBgn0250816 | 0.2614           | 0.0147        | 0.0563        | 0.2648           | 0.0208        | 0.0785        | piRNA gene       |
| <i>armi</i>    | FBgn0041164 | 0.2973           | 0.0154        | 0.0518        | 0.3905           | 0.0222        | 0.0569        | piRNA gene       |
| <i>aub</i>     | FBgn0000146 | 0.3824           | 0.0263        | 0.0687        | 0.5301           | 0.0338        | 0.0637        | piRNA gene       |
| <i>krimp</i>   | FBgn0034098 | 0.4705           | 0.0342        | 0.0728        | 0.9641           | 0.0602        | 0.0625        | piRNA gene       |
| <i>mael</i>    | FBgn0016034 | 0.9024           | 0.0324        | 0.0359        | 0.4907           | 0.0267        | 0.0545        | piRNA gene       |
| <i>Hen1</i>    | FBgn0033686 | 0.2464           | 0.0159        | 0.0644        | 0.2658           | 0.0192        | 0.0721        | piRNA gene       |
| <i>piwi</i>    | FBgn0004872 | 0.0807           | 0.0067        | 0.0836        | 0.1935           | 0.0093        | 0.0483        | piRNA gene       |
| <i>rhi</i>     | FBgn0004400 | 1.4145           | 0.0764        | 0.054         | 0.5077           | 0.0556        | 0.1096        | piRNA gene       |
| <i>Spn-E</i>   | FBgn0003483 | 0.2186           | 0.014         | 0.0642        | 0.2812           | 0.0166        | 0.0591        | piRNA gene       |
| <i>squ</i>     | FBgn0002652 | 0.2399           | 0.0228        | 0.095         | 0.3376           | 0.0496        | 0.1469        | piRNA gene       |
| <i>vas</i>     | FBgn0262526 | 0.2425           | 0.0453        | 0.1867        | 0.306            | 0.0437        | 0.143         | piRNA gene       |
| <i>zuc</i>     | FBgn0261266 | 0.3585           | 0.0353        | 0.0985        | 0.2068           | 0.0214        | 0.1033        | piRNA gene       |
| <i>Hrb27C</i>  | FBgn0004838 | 0.176            | 0.0021        | 0.0117        | 0.019            | 0.001         | 0.0538        | P element gene   |
| <i>Irbp</i>    | FBgn0011774 | 0.1009           | 0.0088        | 0.0875        | 0.1635           | 0.0154        | 0.0944        | P element gene   |
| <i>Ku80</i>    | FBgn0041627 | 0.1805           | 0.0125        | 0.069         | 0.245            | 0.0157        | 0.0642        | P element gene   |
| <i>Psi</i>     | FBgn0014870 | 0.0908           | 0.0052        | 0.0575        | 0.0267           | 0.0011        | 0.0401        | P element gene   |
| <i>AttA</i>    | FBgn0012042 | 0.0851           | 0.0151        | 0.178         | 0.1005           | 0.013         | 0.1294        | effector         |
| <i>AttB</i>    | FBgn0041581 | 0.0351           | 0.0024        | 0.0677        | 0.0675           | 0.0062        | 0.0915        | effector         |
| <i>AttC</i>    | FBgn0000276 | 0.0544           | 0.0085        | 0.1555        | 0.1263           | 0.0062        | 0.0489        | effector         |
| <i>AttD</i>    | FBgn0038530 | 0.0948           | 0.0081        | 0.0851        | 0.3633           | 0.0158        | 0.0435        | effector         |
| <i>Catsup</i>  | FBgn0002022 | 0.1012           | 0.009         | 0.0886        | 0.2507           | 0.0166        | 0.0662        | effector         |
| <i>CecA1</i>   | FBgn0000276 | 0.0001           | 0             | 0.0648        | NA               | NA            | NA            | effector         |
| <i>CecA2</i>   | FBgn0000277 | NA               | NA            | NA            | NA               | NA            | NA            | effector         |
| <i>CecB</i>    | FBgn0000278 | 0.0001           | 0             | 0.1231        | 0.3626           | 0.0069        | 0.0191        | effector         |
| <i>CecC</i>    | FBgn0000279 | 0.0001           | 0             | 0.1431        | NA               | NA            | NA            | effector         |
| <i>CG11159</i> | FBgn0034539 | 0.0001           | 0             | 0.0766        | NA               | NA            | NA            | effector         |
| <i>CG14823</i> | FBgn0035734 | 0.1411           | 0.0102        | 0.072         | 0.188            | 0.0033        | 0.0176        | effector         |
| <i>CG15293</i> | FBgn0028526 | 0.4002           | 0.0353        | 0.0882        | 0.5249           | 0.0262        | 0.0499        | effector         |
| <i>CG15825</i> | FBgn0032773 | 0.1421           | 0.0152        | 0.1068        | 0.228            | 0.0072        | 0.0315        | effector         |
| <i>CG16756</i> | FBgn0029765 | 0.0854           | 0.0084        | 0.0985        | 0.1899           | 0.0173        | 0.0911        | effector         |
| <i>CG16799</i> | FBgn0034538 | 0.0678           | 0.0074        | 0.1092        | 0.1242           | 0.0047        | 0.0379        | effector         |
| <i>CG18107</i> | FBgn0034330 | 0.5364           | 0.0443        | 0.0825        | 0.0001           | 0             | 0.0543        | effector         |
| <i>CG33470</i> | FBgn0053470 | NA               | NA            | NA            | NA               | NA            | NA            | effector         |
| <i>CG6421</i>  | FBgn0025827 | 0.1022           | 0.0101        | 0.0985        | 0.1508           | 0.0079        | 0.0523        | effector         |
| <i>CG6426</i>  | FBgn0034162 | 0.062            | 0.0037        | 0.06          | 0.377            | 0.1255        | 0.3328        | effector         |

|                |             |        |        |        |        |        |        |          |
|----------------|-------------|--------|--------|--------|--------|--------|--------|----------|
| <i>CG6429</i>  | FBgn0046999 | 0.1226 | 0.0122 | 0.0999 | 0.0681 | 0.0099 | 0.1458 | effector |
| <i>CG6435</i>  | FBgn0034165 | 0.0001 | 0      | 0.0785 | 0.0581 | 0.0027 | 0.0469 | effector |
| <i>CG7798</i>  | FBgn0034092 | 0.0189 | 0.0029 | 0.1545 | 0.0001 | 0      | 0.0682 | effector |
| <i>CG8193</i>  | FBgn0033367 | 0.0235 | 0.0024 | 0.1001 | 0.0734 | 0.0089 | 0.1215 | effector |
| <i>CG8492</i>  | FBgn0035813 | 0.127  | 0.007  | 0.0552 | 0.1144 | 0.0069 | 0.0601 | effector |
| <i>Ddc</i>     | FBgn0000422 | 0.0184 | 0.0017 | 0.0904 | 0.0001 | 0      | 0.0413 | effector |
| <i>Def</i>     | FBgn0010385 | 0.1745 | 0.0151 | 0.0865 | 0.0001 | 0      | 0.0265 | effector |
| <i>Dpt</i>     | FBgn0004240 | 0.1002 | 0.011  | 0.1096 | NA     | NA     | NA     | effector |
| <i>DptB</i>    | FBgn0034407 | 0.0811 | 0.0079 | 0.097  | 0.2091 | 0.0078 | 0.0373 | effector |
| <i>Dro</i>     | FBgn0010388 | 0.2487 | 0.0149 | 0.0601 | 0.3377 | 0.0144 | 0.0426 | effector |
| <i>Dro-2</i>   | FBgn0052279 | 0.0001 | 0      | 0.0665 | 0.1467 | 0.0124 | 0.0846 | effector |
| <i>Dro-3</i>   | FBgn0052283 | NA     | NA     | NA     | NA     | NA     | NA     | effector |
| <i>Dro-4</i>   | FBgn0052282 | NA     | NA     | NA     | 0.0001 | 0      | 0.0186 | effector |
| <i>Dro-5</i>   | FBgn0035434 | NA     | NA     | NA     | 0.0001 | 0      | 0.0263 | effector |
| <i>Dro6</i>    | FBgn0052268 | 0.2098 | 0.0123 | 0.0585 | 0.0676 | 0.006  | 0.0892 | effector |
| <i>Drs</i>     | FBgn0010381 | NA     | NA     | NA     | NA     | NA     | NA     | effector |
| <i>Drs-l</i>   | FBgn0052274 | 1.0897 | 0.0367 | 0.0337 | 0.0001 | 0      | 0.0615 | effector |
| <i>Duox</i>    | FBgn0031464 | 0.0028 | 0.0003 | 0.0986 | 0.0147 | 0.0011 | 0.0749 | effector |
| <i>Hml</i>     | FBgn0029167 | 0.0503 | 0.0046 | 0.0906 | 0.1561 | 0.0118 | 0.0757 | effector |
| <i>IM1</i>     | FBgn0034329 | 0.08   | 0.0108 | 0.1349 | 0.0001 | 0      | 0.041  | effector |
| <i>IM10</i>    | FBgn0033835 | 0.1533 | 0.0105 | 0.0686 | 0.2858 | 0.0222 | 0.0776 | effector |
| <i>IM2</i>     | FBgn0025583 | 0.0001 | 0      | 0.0917 | 0.2206 | 0.0109 | 0.0495 | effector |
| <i>IM23</i>    | FBgn0034328 | NA     | NA     | NA     | NA     | NA     | NA     | effector |
| <i>IM3</i>     | FBgn0040736 | 0.1634 | 0.0117 | 0.0717 | 0.0001 | 0      | 0.0339 | effector |
| <i>IM4</i>     | FBgn0040653 | 0.0001 | 0      | 0.0729 | NA     | NA     | NA     | effector |
| <i>Irc</i>     | FBgn0038465 | 0.0771 | 0.0061 | 0.0796 | 0.0988 | 0.0069 | 0.0696 | effector |
| <i>Jafrac1</i> | FBgn0040309 | 0.0001 | 0      | 0.1406 | 0.0001 | 0      | 0.0583 | effector |
| <i>Jafrac2</i> | FBgn0040308 | 0.0001 | 0      | 0.0951 | 0.0001 | 0      | 0.0606 | effector |
| <i>LysB</i>    | FBgn0004425 | NA     | NA     | NA     | NA     | NA     | NA     | effector |
| <i>LysC</i>    | FBgn0004426 | NA     | NA     | NA     | NA     | NA     | NA     | effector |
| <i>LysD</i>    | FBgn0004427 | NA     | NA     | NA     | NA     | NA     | NA     | effector |
| <i>LysE</i>    | FBgn0004428 | NA     | NA     | NA     | NA     | NA     | NA     | effector |
| <i>LysP</i>    | FBgn0004429 | NA     | NA     | NA     | NA     | NA     | NA     | effector |
| <i>LysS</i>    | FBgn0004430 | NA     | NA     | NA     | NA     | NA     | NA     | effector |
| <i>LysX</i>    | FBgn0004431 | 0.273  | 0.0168 | 0.0614 | 0.1854 | 0.0122 | 0.066  | effector |
| <i>Mtk</i>     | FBgn0014865 | 0.0001 | 0      | 0.0246 | 0.178  | 0.0089 | 0.05   | effector |
| <i>ple</i>     | FBgn0005626 | 0.0357 | 0.0021 | 0.0598 | 0.0225 | 0.0007 | 0.0312 | effector |
| <i>Pu</i>      | FBgn0003162 | 0.097  | 0.004  | 0.0414 | 0.0001 | 0      | 0.0376 | effector |
| <i>Tig</i>     | FBgn0011722 | 0.0331 | 0.0043 | 0.1301 | 0.0573 | 0.0047 | 0.0822 | effector |

|                  |             |        |        |        |        |        |        |             |
|------------------|-------------|--------|--------|--------|--------|--------|--------|-------------|
| <i>TotA</i>      | FBgn0028396 | 0.7779 | 0.0348 | 0.0447 | 0.6271 | 0.0222 | 0.0354 | effector    |
| <i>TotB</i>      | FBgn0038838 | 0.435  | 0.0225 | 0.0517 | 0.5846 | 0.0278 | 0.0475 | effector    |
| <i>TotC</i>      | FBgn0044812 | NA     | NA     | NA     | NA     | NA     | NA     | effector    |
| <i>TotE</i>      | FBgn0053117 | 0.2167 | 0.0246 | 0.1137 | 0.1744 | 0.0087 | 0.0502 | effector    |
| <i>TotF</i>      | FBgn0044811 | NA     | NA     | NA     | NA     | NA     | NA     | effector    |
| <i>TotM</i>      | FBgn0031701 | 0.3909 | 0.0449 | 0.1148 | 0.2715 | 0.0193 | 0.0713 | effector    |
| <i>TotX</i>      | FBgn0044810 | 0.3709 | 0.0247 | 0.0667 | 0.8708 | 0.0245 | 0.0282 | effector    |
| <i>TotZ</i>      | FBgn0044809 | 0.0932 | 0.0033 | 0.0356 | 0.0001 | 0      | 0.0377 | effector    |
| <i>Tsf1</i>      | FBgn0022355 | 0.0331 | 0.003  | 0.0915 | 0.0936 | 0.0113 | 0.1207 | effector    |
| <i>Tsf2</i>      | FBgn0036299 | 0.0267 | 0.0021 | 0.0791 | 0.0272 | 0.002  | 0.0749 | effector    |
| <i>Tsf3</i>      | FBgn0034094 | 0.0313 | 0.0029 | 0.0938 | 0.1219 | 0.007  | 0.0571 | effector    |
| <i>yellow-f</i>  | FBgn0041710 | 0.1742 | 0.0137 | 0.0786 | 0.12   | 0.0141 | 0.1174 | effector    |
| <i>yellow-f2</i> | FBgn0038105 | 0.0778 | 0.0071 | 0.0907 | 0.1282 | 0.0078 | 0.061  | effector    |
| <i>CG12780</i>   | FBgn0033301 | 0.1617 | 0.0159 | 0.0983 | 0.5244 | 0.0169 | 0.0323 | recognition |
| <i>CG13079</i>   | FBgn0032808 | 0.7221 | 0.0516 | 0.0715 | 0.4602 | 0.0294 | 0.0639 | recognition |
| <i>CG13422</i>   | FBgn0034511 | 0.1101 | 0.0176 | 0.1599 | 0.1177 | 0.0054 | 0.0456 | recognition |
| <i>CG30148</i>   | FBgn0050148 | 0.1991 | 0.0225 | 0.1131 | 0.463  | 0.0297 | 0.0642 | recognition |
| <i>CG31217</i>   | FBgn0051217 | 0.8493 | 0.0087 | 0.0103 | 0.1307 | 0.0068 | 0.0523 | recognition |
| <i>CG3212</i>    | FBgn0031547 | 0.459  | 0.0292 | 0.0636 | 0.463  | 0.0212 | 0.0458 | recognition |
| <i>CG6124</i>    | FBgn0243514 | 0.6973 | 0.048  | 0.0688 | 1.0046 | 0.0277 | 0.0276 | recognition |
| <i>Corin</i>     | FBgn0033192 | 0.0462 | 0.0035 | 0.0755 | 0.0799 | 0.0061 | 0.076  | recognition |
| <i>crq</i>       | FBgn0015924 | 0.1571 | 0.0088 | 0.0563 | 0.0875 | 0.0071 | 0.0812 | recognition |
| <i>emp</i>       | FBgn0010435 | 0.0001 | 0      | 0.0659 | 0.076  | 0.0032 | 0.0416 | recognition |
| <i>GNBP1</i>     | FBgn0040323 | 0.1069 | 0.0076 | 0.0706 | 0.0308 | 0.0018 | 0.0598 | recognition |
| <i>GNBP2</i>     | FBgn0040322 | 0.0698 | 0.0076 | 0.1086 | 0.1458 | 0.0057 | 0.039  | recognition |
| <i>GNBP3</i>     | FBgn0040321 | 0.0933 | 0.0064 | 0.0683 | 0.1986 | 0.0071 | 0.0356 | recognition |
| <i>He</i>        | FBgn0028430 | 1.0548 | 0.0873 | 0.0827 | 0.4288 | 0.0561 | 0.1307 | recognition |
| <i>Mcr</i>       | FBgn0020240 | 0.0186 | 0.0015 | 0.0826 | 0.0325 | 0.0015 | 0.0476 | recognition |
| <i>NimA</i>      | FBgn0261514 | 0.0459 | 0.0053 | 0.1156 | 0.0891 | 0.0064 | 0.072  | recognition |
| <i>NimB1</i>     | FBgn0027929 | 0.1212 | 0.0147 | 0.1209 | 0.2102 | 0.0112 | 0.0533 | recognition |
| <i>NimB2</i>     | FBgn0028543 | 0.0589 | 0.0051 | 0.0868 | 0.0232 | 0.002  | 0.084  | recognition |
| <i>NimB3</i>     | FBgn0054003 | 0.0799 | 0.0053 | 0.0663 | 0.3395 | 0.0163 | 0.048  | recognition |
| <i>NimB4</i>     | FBgn0028542 | 0.1125 | 0.0123 | 0.1092 | 0.1379 | 0.0168 | 0.1217 | recognition |
| <i>NimB5</i>     | FBgn0028936 | 0.1293 | 0.0068 | 0.0528 | 0.1955 | 0.0104 | 0.053  | recognition |
| <i>NimC1</i>     | FBgn0259896 | 0.5789 | 0.0335 | 0.0579 | 0.6331 | 0.0346 | 0.0547 | recognition |
| <i>NimC2</i>     | FBgn0028939 | 0.0964 | 0.0072 | 0.0746 | 0.1102 | 0.0052 | 0.0469 | recognition |
| <i>NimC3</i>     | FBgn0001967 | 0.1099 | 0.0098 | 0.0888 | 0.0001 | 0      | 0.0836 | recognition |
| <i>NimC4</i>     | FBgn0260011 | 0.0666 | 0.0081 | 0.1224 | 0.0627 | 0.0046 | 0.0732 | recognition |
| <i>pes</i>       | FBgn0031969 | 0.16   | 0.0085 | 0.0531 | 0.1808 | 0.0352 | 0.1947 | recognition |

|                  |             |        |        |        |        |        |        |             |
|------------------|-------------|--------|--------|--------|--------|--------|--------|-------------|
| <i>PGRP-LA</i>   | FBgn0035975 | 0.1364 | 0.0113 | 0.0825 | 0.1091 | 0.0085 | 0.0778 | recognition |
| <i>PGRP-LB</i>   | FBgn0037906 | 0.1298 | 0.0073 | 0.056  | 0.051  | 0.0037 | 0.0731 | recognition |
| <i>PGRP-LC</i>   | FBgn0035976 | 0.1748 | 0.0122 | 0.07   | 0.1985 | 0.0119 | 0.0598 | recognition |
| <i>PGRP-LD</i>   | FBgn0260458 | 0.2447 | 0.01   | 0.0408 | 0.2587 | 0.0204 | 0.0787 | recognition |
| <i>PGRP-LE</i>   | FBgn0030695 | 0.0769 | 0.0052 | 0.0676 | 0.029  | 0.0025 | 0.0858 | recognition |
| <i>PGRP-LF</i>   | FBgn0035977 | 0.2456 | 0.0237 | 0.0966 | 0.2295 | 0.0157 | 0.0686 | recognition |
| <i>PGRP-SA</i>   | FBgn0030310 | 0.113  | 0.0106 | 0.0939 | 0.1491 | 0.0051 | 0.034  | recognition |
| <i>PGRP-SB1</i>  | FBgn0043578 | 0.03   | 0.0037 | 0.1248 | 0.274  | 0.0109 | 0.0397 | recognition |
| <i>PGRP-SB2</i>  | FBgn0043577 | 0.1484 | 0.0156 | 0.1051 | 0.0573 | 0.0022 | 0.0381 | recognition |
| <i>PGRP-SC1a</i> | FBgn0043576 | NA     | NA     | NA     | NA     | NA     | NA     | recognition |
| <i>PGRP-SC1b</i> | FBgn0033327 | 0.0001 | 0      | 0.1259 | 0.0314 | 0.002  | 0.0639 | recognition |
| <i>PGRP-SC2</i>  | FBgn0043575 | 0.0114 | 0.0022 | 0.1892 | 0.1564 | 0.0043 | 0.0277 | recognition |
| <i>PGRP-SD</i>   | FBgn0035806 | 0.1054 | 0.0076 | 0.072  | 0.3752 | 0.0073 | 0.0193 | recognition |
| <i>Sr-CI</i>     | FBgn0014033 | 0.3234 | 0.0428 | 0.1325 | 0.3326 | 0.0333 | 0.1003 | recognition |
| <i>Sr-CII</i>    | FBgn0020377 | 0.2926 | 0.0165 | 0.0562 | 0.1487 | 0.0087 | 0.0587 | recognition |
| <i>Sr-CIII</i>   | FBgn0020376 | 0.9783 | 0.0355 | 0.0363 | 0.3033 | 0.0136 | 0.0448 | recognition |
| <i>TepI</i>      | FBgn0041183 | 0.6271 | 0.0459 | 0.0732 | 0.7154 | 0.0324 | 0.0453 | recognition |
| <i>TepII</i>     | FBgn0041182 | 0.2017 | 0.0182 | 0.0902 | 0.2245 | 0.0169 | 0.0752 | recognition |
| <i>TepIII</i>    | FBgn0041181 | 0.0966 | 0.0053 | 0.0547 | 0.1046 | 0.0053 | 0.0507 | recognition |
| <i>TepIV</i>     | FBgn0041180 | 0.1581 | 0.0109 | 0.0692 | 0.2125 | 0.0081 | 0.0381 | recognition |
| <i>18w</i>       | FBgn0004364 | 0.0054 | 0.0004 | 0.0685 | 0.0241 | 0.0013 | 0.0521 | signaling   |
| <i>Alk</i>       | FBgn0040505 | 0.0155 | 0.0013 | 0.0819 | 0.0148 | 0.0009 | 0.0599 | signaling   |
| <i>aop</i>       | FBgn0000097 | 0.0332 | 0.0013 | 0.0383 | 0.1779 | 0.0045 | 0.0254 | signaling   |
| <i>Atf-2</i>     | FBgn0050420 | 0.1091 | 0.0077 | 0.0703 | 0.1023 | 0.006  | 0.0588 | signaling   |
| <i>ben</i>       | FBgn0000173 | 0.0001 | 0      | 0.0651 | 0.0001 | 0      | 0.0595 | signaling   |
| <i>BG4</i>       | FBgn0038928 | 0.4744 | 0.0418 | 0.0881 | 0.7441 | 0.0358 | 0.0481 | signaling   |
| <i>brm</i>       | FBgn0000212 | 0.007  | 0.0003 | 0.045  | 0.0204 | 0.0009 | 0.046  | signaling   |
| <i>bsk</i>       | FBgn0000229 | 0.0001 | 0      | 0.033  | 0.0001 | 0      | 0.0187 | signaling   |
| <i>cact</i>      | FBgn0000250 | 0.0418 | 0.0009 | 0.021  | 0.1454 | 0.0073 | 0.0502 | signaling   |
| <i>caspar</i>    | FBgn0034068 | 0.0731 | 0.0057 | 0.0776 | 0.093  | 0.005  | 0.0539 | signaling   |
| <i>CG11023</i>   | FBgn0031208 | NA     | NA     | NA     | NA     | NA     | NA     | signaling   |
| <i>CG11501</i>   | FBgn0039666 | 0.2003 | 0.0253 | 0.1262 | 0.218  | 0.0431 | 0.1978 | signaling   |
| <i>CG14225</i>   | FBgn0031055 | NA     | NA     | NA     | NA     | NA     | NA     | signaling   |
| <i>CG16705</i>   | FBgn0039102 | 0.073  | 0.0087 | 0.1193 | 0.0924 | 0.0076 | 0.0826 | signaling   |
| <i>CG2056</i>    | FBgn0030051 | 0.2411 | 0.0356 | 0.1477 | NA     | NA     | NA     | signaling   |
| <i>CG32382</i>   | FBgn0052382 | 0.2103 | 0.0224 | 0.1065 | 0.2277 | 0.0184 | 0.0808 | signaling   |
| <i>CG32383</i>   | FBgn0052383 | NA     | NA     | NA     | NA     | NA     | NA     | signaling   |
| <i>CG5896</i>    | FBgn0039494 | 0.0084 | 0.0014 | 0.1686 | 0.023  | 0.0014 | 0.0616 | signaling   |
| <i>CG6361</i>    | FBgn0030925 | 0.2733 | 0.0246 | 0.0898 | 0.1544 | 0.0168 | 0.109  | signaling   |

|                |             |        |        |        |        |        |        |           |
|----------------|-------------|--------|--------|--------|--------|--------|--------|-----------|
| <i>CG9675</i>  | FBgn0030774 | 0.2781 | 0.0205 | 0.0736 | 0.0827 | 0.0089 | 0.1077 | signaling |
| <i>cher</i>    | FBgn0014141 | 0.0029 | 0.0002 | 0.0636 | 0.0076 | 0.0004 | 0.0479 | signaling |
| <i>Dif</i>     | FBgn0011274 | 0.0742 | 0.0038 | 0.0517 | 0.3065 | 0.0195 | 0.0636 | signaling |
| <i>dl</i>      | FBgn0260632 | 0.0937 | 0.0055 | 0.0587 | 0.1534 | 0.0085 | 0.0553 | signaling |
| <i>Dnr1</i>    | FBgn0260866 | 0.0519 | 0.0051 | 0.0984 | 0.2411 | 0.0211 | 0.0877 | signaling |
| <i>dom</i>     | FBgn0020306 | 0.1153 | 0.0066 | 0.057  | 0.0918 | 0.0042 | 0.0458 | signaling |
| <i>dome</i>    | FBgn0043903 | NA     | NA     | NA     | NA     | NA     | NA     | signaling |
| <i>dpp</i>     | FBgn0000490 | 0.0244 | 0.0015 | 0.0628 | 0.1406 | 0.0041 | 0.0292 | signaling |
| <i>Dredd</i>   | FBgn0020381 | 0.2487 | 0.0217 | 0.0874 | 0.3217 | 0.018  | 0.0558 | signaling |
| <i>Dsor1</i>   | FBgn0010269 | NA     | NA     | NA     | NA     | NA     | NA     | signaling |
| <i>ea</i>      | FBgn0000533 | 0.0164 | 0.0011 | 0.065  | 0.0417 | 0.0032 | 0.0778 | signaling |
| <i>ECSIT</i>   | FBgn0028436 | 0.0694 | 0.0076 | 0.1099 | 0.0223 | 0.0021 | 0.0939 | signaling |
| <i>edl</i>     | FBgn0023214 | 0.1611 | 0.0158 | 0.0981 | 0.2673 | 0.013  | 0.0487 | signaling |
| <i>Egfr</i>    | FBgn0003731 | 0.0085 | 0.0009 | 0.1042 | 0.0723 | 0.005  | 0.0688 | signaling |
| <i>emb</i>     | FBgn0020497 | 0.0245 | 0.0008 | 0.0345 | 0.0001 | 0      | 0.0379 | signaling |
| <i>gcm</i>     | FBgn0014179 | 0.0567 | 0.0073 | 0.1279 | 0.1785 | 0.0072 | 0.0402 | signaling |
| <i>gcm2</i>    | FBgn0019809 | 0.0499 | 0.0035 | 0.0693 | 0.1858 | 0.019  | 0.1023 | signaling |
| <i>Hel89B</i>  | FBgn0022787 | 0.0745 | 0.0056 | 0.0748 | 0.0701 | 0.0032 | 0.0462 | signaling |
| <i>hep</i>     | FBgn0010303 | 0.1243 | 0.0069 | 0.0554 | 0.1565 | 0.0037 | 0.0234 | signaling |
| <i>hop</i>     | FBgn0004864 | 0.0244 | 0.0032 | 0.1333 | 0.1104 | 0.0043 | 0.0392 | signaling |
| <i>lap2</i>    | FBgn0015247 | 0.0293 | 0.0013 | 0.0432 | 0.3387 | 0.0069 | 0.0205 | signaling |
| <i>imd</i>     | FBgn0013983 | 0.1094 | 0.0062 | 0.0566 | 0.0926 | 0.0031 | 0.0333 | signaling |
| <i>ird5</i>    | FBgn0024222 | 0.6424 | 0.0414 | 0.0644 | 0.5904 | 0.0264 | 0.0447 | signaling |
| <i>Jra</i>     | FBgn0001291 | 0.283  | 0.0128 | 0.0451 | 0.0218 | 0.0015 | 0.0712 | signaling |
| <i>kay</i>     | FBgn0001297 | 0.1724 | 0.0186 | 0.108  | 0.4523 | 0.0238 | 0.0527 | signaling |
| <i>key</i>     | FBgn0041205 | 0.6915 | 0.0358 | 0.0518 | 0.2065 | 0.0168 | 0.0815 | signaling |
| <i>kn</i>      | FBgn0001319 | 0.0001 | 0      | 0.0566 | 0.2697 | 0.0041 | 0.0153 | signaling |
| <i>lwr</i>     | FBgn0010602 | 0.0001 | 0      | 0.1845 | 0.0001 | 0      | 0.043  | signaling |
| <i>lz</i>      | FBgn0002576 | 0.0993 | 0.0054 | 0.0541 | 0.4277 | 0.0183 | 0.0427 | signaling |
| <i>mask</i>    | FBgn0043884 | 0.1113 | 0.0061 | 0.0544 | 0.1502 | 0.0064 | 0.0424 | signaling |
| <i>mbo</i>     | FBgn0026207 | 0.1619 | 0.0106 | 0.0656 | 0.3973 | 0.0218 | 0.055  | signaling |
| <i>Mekk1</i>   | FBgn0024329 | 0.1261 | 0.0068 | 0.0542 | 0.0374 | 0.0023 | 0.0618 | signaling |
| <i>Mkk4</i>    | FBgn0024326 | 0.0279 | 0.0021 | 0.0743 | 0.0001 | 0      | 0.0337 | signaling |
| <i>MP1</i>     | FBgn0027930 | 0.2143 | 0.0126 | 0.0589 | 0.3672 | 0.0184 | 0.0502 | signaling |
| <i>MP2</i>     | FBgn0037515 | 0.1428 | 0.0096 | 0.0671 | 0.2001 | 0.0105 | 0.0523 | signaling |
| <i>Mpk2</i>    | FBgn0015765 | 0.0508 | 0.0037 | 0.0722 | 0.0249 | 0.0012 | 0.0474 | signaling |
| <i>msn</i>     | FBgn0010909 | 0.02   | 0.0011 | 0.055  | 0.2116 | 0.0081 | 0.0381 | signaling |
| <i>MstProx</i> | FBgn0015770 | 0.0001 | 0      | 0.0903 | 0.2794 | 0.0267 | 0.0954 | signaling |
| <i>mxc</i>     | FBgn0261524 | 0.0001 | 0      | 0.089  | 0.0001 | 0      | 0.0403 | signaling |

|                    |             |        |        |        |        |        |        |           |
|--------------------|-------------|--------|--------|--------|--------|--------|--------|-----------|
| <i>Myd88</i>       | FBgn0033402 | 0.0001 | 0      | 0.0579 | 0.0077 | 0.0008 | 0.1001 | signaling |
| <i>N</i>           | FBgn0004647 | 0.0348 | 0.0068 | 0.1949 | 0.0171 | 0.0016 | 0.0937 | signaling |
| <i>nec</i>         | FBgn0002930 | 0.1617 | 0.0161 | 0.0998 | 0.2151 | 0.0195 | 0.0907 | signaling |
| <i>Nos</i>         | FBgn0011676 | 0.0623 | 0.0042 | 0.0671 | 0.2299 | 0.018  | 0.0784 | signaling |
| <i>Ntf-2</i>       | FBgn0031145 | 0.0001 | 0      | 0.0304 | 0.0216 | 0.0033 | 0.1547 | signaling |
| <i>Ntf-2r</i>      | FBgn0032680 | NA     | NA     | NA     | NA     | NA     | NA     | signaling |
| <i>Nup214</i>      | FBgn0010660 | 0.2926 | 0.0159 | 0.0544 | 0.4797 | 0.0251 | 0.0522 | signaling |
| <i>os</i>          | FBgn0004956 | 0.0067 | 0.0007 | 0.1049 | 0.1633 | 0.0123 | 0.0756 | signaling |
| <i>p38b</i>        | FBgn0024846 | 0.0122 | 0.0012 | 0.0961 | 0.0001 | 0      | 0.0367 | signaling |
| <i>phl</i>         | FBgn0003079 | 0.042  | 0.0024 | 0.0567 | 0.0001 | 0      | 0.0313 | signaling |
| <i>pll</i>         | FBgn0010441 | 0.0083 | 0.001  | 0.1269 | 0.0693 | 0.0068 | 0.0977 | signaling |
| <i>pnt</i>         | FBgn0003118 | 0.0849 | 0.0071 | 0.0837 | 0.1334 | 0.0078 | 0.0583 | signaling |
| <i>POSH</i>        | FBgn0040294 | 0.0917 | 0.0039 | 0.0424 | 0.24   | 0.0081 | 0.0338 | signaling |
| <i>psh</i>         | FBgn0030926 | 0.0382 | 0.0058 | 0.1513 | 0.5135 | 0.0378 | 0.0736 | signaling |
| <i>puc</i>         | FBgn0243512 | 0.1645 | 0.0081 | 0.0494 | 0.2738 | 0.006  | 0.0218 | signaling |
| <i>Pvf1</i>        | FBgn0030964 | 0.017  | 0.0018 | 0.1039 | 0.0001 | 0      | 0.1067 | signaling |
| <i>Pvf2</i>        | FBgn0031888 | 0.1487 | 0.0141 | 0.0948 | 0.2669 | 0.0075 | 0.0281 | signaling |
| <i>Pvf3</i>        | FBgn0085407 | 0.0373 | 0.0056 | 0.15   | 0.0821 | 0.0022 | 0.0269 | signaling |
| <i>Pvr</i>         | FBgn0032006 | 0.0556 | 0.0051 | 0.0918 | 0.1103 | 0.0056 | 0.0505 | signaling |
| <i>Rac1</i>        | FBgn0010333 | 0.0001 | 0      | 0.054  | 0.0001 | 0      | 0.0509 | signaling |
| <i>Rac2</i>        | FBgn0014011 | 0.0001 | 0      | 0.0571 | 0.0001 | 0      | 0.0675 | signaling |
| <i>Ras85D</i>      | FBgn0003205 | 0.0001 | 0      | 0.0539 | 0.0001 | 0      | 0.0167 | signaling |
| <i>ref(2)P</i>     | FBgn0003231 | 0.5284 | 0.0209 | 0.0395 | 0.2144 | 0.0102 | 0.0475 | signaling |
| <i>Rel</i>         | FBgn0014018 | 0.4843 | 0.0287 | 0.0592 | 0.4329 | 0.0254 | 0.0586 | signaling |
| <i>RpS6</i>        | FBgn0261592 | 0.0232 | 0.0017 | 0.0729 | 0.0001 | 0      | 0.0418 | signaling |
| <i>SAE1</i>        | FBgn0029512 | 0.053  | 0.0054 | 0.102  | 0.0727 | 0.0052 | 0.0715 | signaling |
| <i>SAE2</i>        | FBgn0029113 | 0.1187 | 0.0053 | 0.0445 | 0.0989 | 0.0061 | 0.0618 | signaling |
| <i>Ser</i>         | FBgn0004197 | 0.1331 | 0.0046 | 0.0347 | 0.0692 | 0.0027 | 0.0386 | signaling |
| <i>slbo</i>        | FBgn0005638 | 0.0187 | 0.0038 | 0.2049 | 0.118  | 0.0115 | 0.097  | signaling |
| <i>slpr</i>        | FBgn0030018 | 0.0626 | 0.0055 | 0.0883 | 0.4856 | 0.0138 | 0.0284 | signaling |
| <i>smt3</i>        | FBgn0026170 | 0.0001 | 0      | 0.0561 | 0.0001 | 0      | 0.1209 | signaling |
| <i>Socs36E</i>     | FBgn0041184 | 0.1194 | 0.0084 | 0.0707 | 0.1435 | 0.0058 | 0.0405 | signaling |
| <i>Spn27A</i>      | FBgn0028990 | 0.0001 | 0      | 0.1094 | 0.1119 | 0.0056 | 0.0501 | signaling |
| <i>spz</i>         | FBgn0003495 | 0.199  | 0.0165 | 0.0827 | 0.2719 | 0.016  | 0.0589 | signaling |
| <i>srp</i>         | FBgn0003507 | 0.4695 | 0.0293 | 0.0624 | 0.3705 | 0.0194 | 0.0522 | signaling |
| <i>Stam</i>        | FBgn0027363 | 0.0571 | 0.0052 | 0.0905 | 0.2015 | 0.0122 | 0.0603 | signaling |
| <i>Stat92E</i>     | FBgn0016917 | 0.0263 | 0.0011 | 0.0433 | 0.1109 | 0.0057 | 0.0518 | signaling |
| <i>Su(H)</i>       | FBgn0004837 | 0.0001 | 0      | 0.0549 | 0.1309 | 0.0083 | 0.0634 | signaling |
| <i>Su(var)2-10</i> | FBgn0003612 | 0.0804 | 0.0036 | 0.0449 | 0.0591 | 0.0008 | 0.0137 | signaling |

|               |             |        |        |        |        |        |        |           |
|---------------|-------------|--------|--------|--------|--------|--------|--------|-----------|
| <i>Tab2</i>   | FBgn0086358 | 0.1113 | 0.0076 | 0.0683 | 0.1541 | 0.005  | 0.0328 | signaling |
| <i>Tak1</i>   | FBgn0026323 | 0.1479 | 0.0082 | 0.0551 | 0.203  | 0.0066 | 0.0323 | signaling |
| <i>tamo</i>   | FBgn0041582 | 0.0761 | 0.0099 | 0.13   | 0.3117 | 0.0143 | 0.0457 | signaling |
| <i>Tehao</i>  | FBgn0026760 | 0.0413 | 0.0055 | 0.1321 | 0.1396 | 0.0081 | 0.0582 | signaling |
| <i>Thor</i>   | FBgn0261560 | 0.0437 | 0.0037 | 0.084  | 0.0001 | 0      | 0.0519 | signaling |
| <i>Tl</i>     | FBgn0262473 | 0.096  | 0.009  | 0.0935 | 0.0452 | 0.0037 | 0.0808 | signaling |
| <i>Toll-4</i> | FBgn0032095 | 0.395  | 0.0219 | 0.0556 | 0.526  | 0.0236 | 0.0448 | signaling |
| <i>Toll-6</i> | FBgn0036494 | 0.0191 | 0.0015 | 0.0773 | 0.0531 | 0.0021 | 0.0387 | signaling |
| <i>Toll-7</i> | FBgn0034476 | 0.0118 | 0.0006 | 0.0538 | 0.0325 | 0.0013 | 0.0389 | signaling |
| <i>Toll-9</i> | FBgn0036978 | 0.1592 | 0.0114 | 0.0717 | 0.1282 | 0.0083 | 0.0644 | signaling |
| <i>Tollo</i>  | FBgn0029114 | 0.0299 | 0.0017 | 0.0576 | 0.0468 | 0.0023 | 0.0501 | signaling |
| <i>Traf1</i>  | FBgn0026319 | 0.0001 | 0      | 0.1    | 0.0201 | 0.0009 | 0.0439 | signaling |
| <i>Traf2</i>  | FBgn0026318 | 0.0001 | 0      | 0.0548 | 0.0854 | 0.0068 | 0.079  | signaling |
| <i>Traf3</i>  | FBgn0030748 | 0.0523 | 0.0056 | 0.1075 | 0.0109 | 0.0009 | 0.0793 | signaling |
| <i>tub</i>    | FBgn0003882 | 0.2028 | 0.0084 | 0.0413 | 0.1457 | 0.0066 | 0.0451 | signaling |
| <i>Uev1A</i>  | FBgn0035601 | 0.0001 | 0      | 0.0239 | NA     | NA     | NA     | signaling |
| <i>Ulp1</i>   | FBgn0027603 | 0.7093 | 0.0586 | 0.0827 | 0.9442 | 0.0671 | 0.0711 | signaling |
| <i>upd2</i>   | FBgn0030904 | 0.0333 | 0.0055 | 0.1655 | 0.2773 | 0.0032 | 0.0114 | signaling |
| <i>upd3</i>   | FBgn0053542 | NA     | NA     | NA     | NA     | NA     | NA     | signaling |
| <i>ush</i>    | FBgn0003963 | 0.1476 | 0.007  | 0.0473 | 0.5598 | 0.027  | 0.0482 | signaling |
| <i>WntD</i>   | FBgn0038134 | 0.0429 | 0.0029 | 0.0679 | 0.1115 | 0.0044 | 0.0392 | signaling |
| <i>ytr</i>    | FBgn0021895 | 0.2964 | 0.0024 | 0.0082 | 0.0001 | 0      | 0.0196 | signaling |

---
