# Supplementary material
Source: PubMed Central journal article supplement (PMC3512147)
Supplement: c0f4ad6187e16d3ca5135d6b3553e998_genetics.112.145714-2.pdf [file c0f4ad6187e16d3ca5135d6b3553e998_genetics.112.145714-2.pdf]

**Table S3 Temporal and geographic differentiation of all candidate genes**

|               | no. M strain | M strain $\pi$ |        | <i>temporal differentiation</i> |                | <i>geographic differentiation</i> <sup>b</sup> |                   |
|---------------|--------------|----------------|--------|---------------------------------|----------------|------------------------------------------------|-------------------|
|               |              | nonsyn         | syn    | <i>Fst</i>                      | <i>p-value</i> | <i>Fst</i>                                     | <i>p-value</i>    |
| <i>AGO3</i>   | 8            | 0.0000         | 0.0010 | -0.067                          | 0.824          | 0.125                                          | 0.121             |
| <i>armi</i>   | 8            | 0.0015         | 0.0094 | -0.045                          | 0.897          | 0.237                                          | <b>&lt; 0.001</b> |
| <i>aub</i>    | 8            | 0.0009         | 0.0065 | -0.045                          | 0.883          | 0.484                                          | <b>&lt; 0.001</b> |
| <i>Hen1</i>   | 30           | 0.0013         | 0.0097 | <b>0.303</b>                    | <b>0.001</b>   | 0.632                                          | <b>&lt; 0.001</b> |
| <i>Hrb27C</i> | 8            | 0.0008         | 0.0025 | 0.048                           | 0.153          | 0.116                                          | 0.083             |
| <i>Irbp</i>   | 30           | 0.0020         | 0.0058 | <b>0.170</b>                    | <b>0.038</b>   | 0.144                                          | 0.111             |
| <i>krimp</i>  | 30           | 0.0076         | 0.0304 | 0.011                           | 0.262          | 0.143                                          | <b>0.004</b>      |
| <i>Ku80</i>   | 8            | 0.0018         | 0.0134 | -0.035                          | 0.891          | 0.256                                          | <b>0.001</b>      |
| <i>mael</i>   | 8            | 0.0015         | 0.0000 | -0.061                          | 0.98           | 0.344                                          | <b>&lt; 0.001</b> |
| <i>piwi</i>   | 8            | 0.0011         | 0.0121 | 0.051                           | 0.092          | 0.172                                          | <b>0.006</b>      |
| <i>Psi</i>    | 8            | 0.0007         | 0.0123 | 0.034                           | 0.204          | 0.338                                          | <b>&lt; 0.001</b> |
| <i>rhi</i>    | 8            | 0.0017         | 0.0056 | -0.013                          | 0.469          | 0.236                                          | <b>0.013</b>      |
| <i>Spn-E</i>  | 30           | 0.0010         | 0.0033 | 0.053                           | 0.08           | 0.459                                          | <b>&lt; 0.001</b> |
| <i>squ</i>    | 30           | 0.0016         | 0.0080 | <b>0.202</b>                    | <b>0.001</b>   | 0.028                                          | 0.25              |
| <i>vas</i>    | 8            | 0.0005         | 0.0045 | 0.025                           | 0.223          | 0.213                                          | <b>0.003</b>      |
| <i>zuc</i>    | 8            | 0.0000         | 0.0054 | -0.052                          | 0.797          | 0.284                                          | <b>0.005</b>      |

<sup>a</sup>Genetic differentiation between current (*post-P element*) African and North American populations

<sup>b</sup>Genetic differentiation between *pre-P* and *post-P* element invasion populations

All the significant results are in bold-type
